# Supplementary material
Source: MDPI journal article supplement (https://www.mdpi.com/2073-4395/12/10/2280)
Supplement: s1 [file s1]

## **Supplementary Information**

### **Assessment of heavy metal remediation (mussel shell, pine bark and EDTA-washing) in soil using bacterial community tolerance as indicator**

Claudia Campillo-Cora<sup>a</sup>, Soto-Gómez, Diego<sup>b</sup>, Manuel Arias-Estévez<sup>a</sup>, David Fernández-Calviño<sup>a</sup>

a Departamento de Biología Vexetal e Ciencia do Solo, Facultade de Ciencias, Universidade de Vigo, As Lagoas s/n, 32004 Ourense, Spain

b Department of Agricultural Engineering, Technical University of Cartagena, Paseo Alfonso XIII, 48, Cartagena, 30203, Spain

c Department of Biology, Microbial Ecology – MEMEG, Lund University, Ecology Building, Lund, SE-223 62, Sweden

## Tables

**Table S1.** Bio-sorbent properties (crushed mussel shell and pine bark). Average values (n=3) with coefficients of variation <5%. Data from Romar-Gasalla et al. (2018)

|                                                       | Crushed mussel shell Pine bark |       |
|-------------------------------------------------------|--------------------------------|-------|
| C (%)                                                 | 11.43                          | 46.95 |
| N (%)                                                 | 0.21                           | 0.32  |
| pHw                                                   | 9.39                           | 3.99  |
| Surface area (g m <sup>-2</sup> )                     | 1.1                            | 0.4   |
| Ca <sub>e</sub> (cmol <sub>c</sub> kg <sup>-1</sup> ) | 24.75                          | 5.38  |
| Mg <sub>e</sub> (cmol <sub>c</sub> kg <sup>-1</sup> ) | 0.72                           | 2.70  |
| Na <sub>e</sub> (cmol <sub>c</sub> kg <sup>-1</sup> ) | 4.37                           | 0.46  |
| K <sub>e</sub> (cmol <sub>c</sub> kg <sup>-1</sup> )  | 0.38                           | 4.60  |
| Al <sub>e</sub> (cmol <sub>c</sub> kg <sup>-1</sup> ) | 0.03                           | 1.78  |
| eCEC (cmol <sub>c</sub> kg <sup>-1</sup> )            | 30.25                          | 14.92 |
| Ca <sub>T</sub> (mg kg <sup>-1</sup> )                | 280168                         | 2319  |
| Mg <sub>T</sub> (mg kg <sup>-1</sup> )                | 980.6                          | 473.6 |
| Al <sub>T</sub> (mg kg <sup>-1</sup> )                | 433.2                          | 561.1 |
| Fe <sub>T</sub> (mg kg <sup>-1</sup> )                | 1855                           | 169.8 |
| Al <sub>o</sub> (mg kg <sup>-1</sup> )                | 178.3                          | 315.0 |
| Fe <sub>o</sub> (mg kg <sup>-1</sup> )                | 171.0                          | 74.02 |

C is total carbon; N is total nitrogen; pHw is pH measured in water;  $X_e$  is exchangeable concentration of the element (cmol(+) kg<sup>-1</sup>); eCEC is the effective cation exchange capacity (cmol<sub>c</sub> kg<sup>-1</sup>);  $X_T$  is total concentration of cation (mg kg<sup>-1</sup>); Al<sub>o</sub>, Fe<sub>o</sub>: extracted with ammonium oxalate (mg kg<sup>-1</sup>).

**Table S2.** Percentage of decreased bacterial community tolerance to Cu, Ni and Zn in a polluted soil ( $1000 \text{ mg} \cdot \text{kg}^{-1}$ ) after three remediation techniques: mussel shell application (CMS), pine bark application (PB) or soil washing with EDTA (EDTA).

| Metal<br>( $1000 \text{ mg} \cdot \text{kg}^{-1}$ ) | CMS   | PB   | EDTA |
|-----------------------------------------------------|-------|------|------|
| Cu                                                  | -91%  | -82% | -42% |
| Ni                                                  | -81%  | -84% | -97% |
| Zn                                                  | -140% | -92% | -87% |

## References

Romar-Gasalla, A., Santás-Miguel, V., Nóvoa-Muñoz, J.C., Arias-Estévez, M., Álvarez-Rodríguez, E., Núñez-Delgado, A., Fernández-Sanjurjo, M.J., 2018. Chromium and fluoride sorption/desorption on un-amended and waste-amended forest and vineyard soils and pyritic material. *Journal of Environmental Management* 222, 3–11. doi:10.1016/J.JENVMAN.2018.05.050
